# Supplementary material for: Balancing gene transfection and cytotoxicity of nucleic acid carriers with focus on ocular and hepatic disorders: evaluation of hydrophobic and hydrophilic polyethyleneimine derivatives
Source: Royal Society of Chemistry journal article supplement (doi:10.1039/d3tb00477e), 2023-01-01

Supporting Information File for the Manuscript Entitled

**Balancing Gene Transfection and Cytotoxicity of Nucleic Acid  
Carriers with Focus on Ocular and Hepatic Disorders: Evaluation of  
Hydrophobic and Hydrophilic Polyethyleneimine Derivatives**

*Fernando A. de Oliveira,<sup>a</sup> Lindomar J. C. Albuquerque,<sup>a</sup> Michelle Nascimento-Sales,<sup>a</sup>  
Marcelo A. Christoffolete,<sup>a</sup> Ismael C. Bellettini,<sup>b</sup> and Fernando C. Giacomelli<sup>a,\*</sup>*

<sup>a</sup> Centro de Ciências Naturais e Humanas, Universidade Federal do ABC, Santo André,  
Brazil.

<sup>b</sup> Departamento de Ciências Exatas e Educação, Universidade Federal de Santa  
Catarina, Blumenau, Brazil.

\*Corresponding Author: Fernando Carlos Giacomelli  
e-mail. [fernando.giacomelli@ufabc.edu.br](mailto:fernando.giacomelli@ufabc.edu.br)



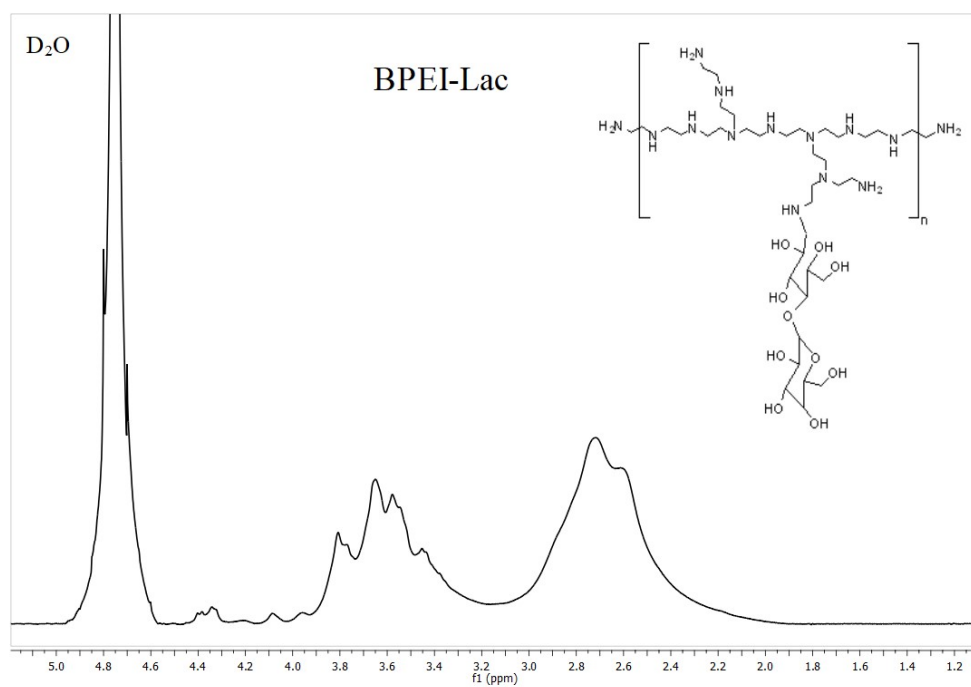

**Figure S2.** <sup>1</sup>H NMR (400 MHz) spectra of BPEI-Lac in D<sub>2</sub>O.

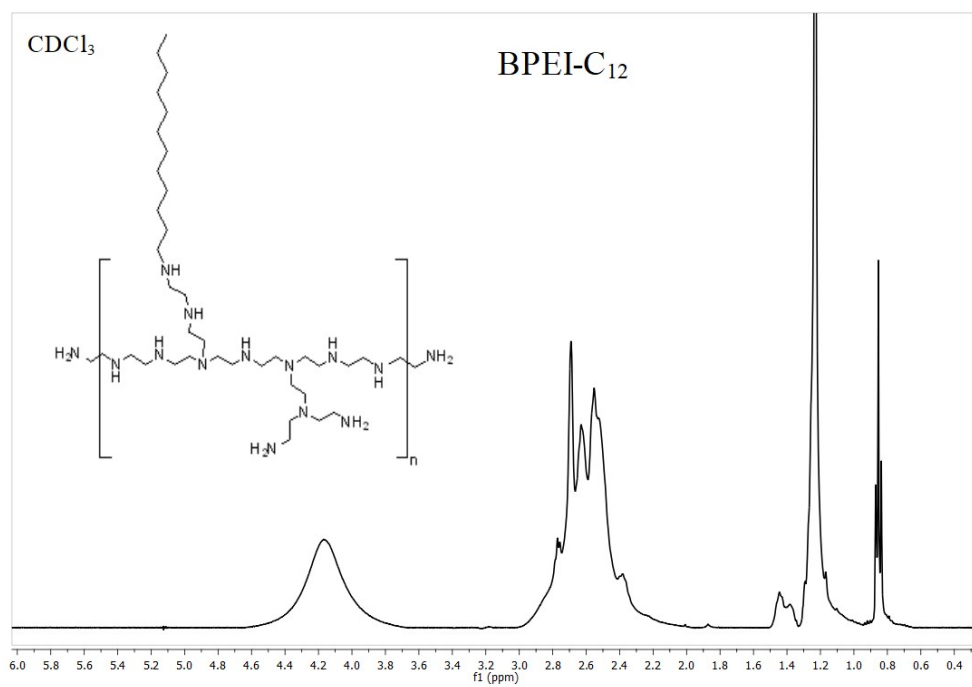

**Figure S3.** <sup>1</sup>H NMR (400 MHz) spectra of BPEI-C<sub>12</sub> in CDCl<sub>3</sub>.

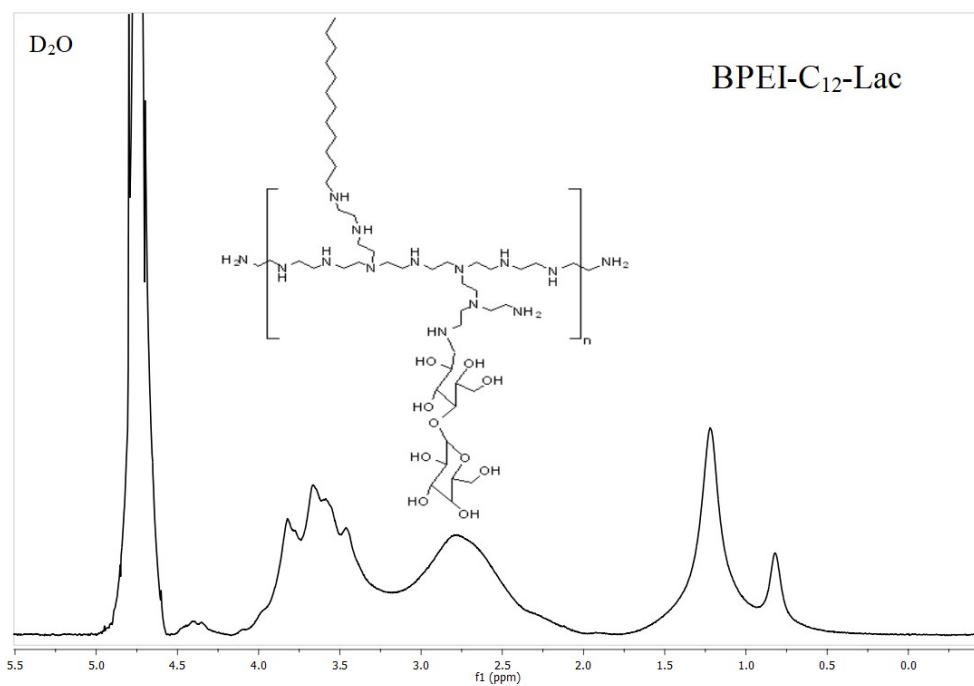

**Figure S4.** <sup>1</sup>H NMR (400 MHz) spectra of BPEI-C<sub>12</sub>-Lac in D<sub>2</sub>O.

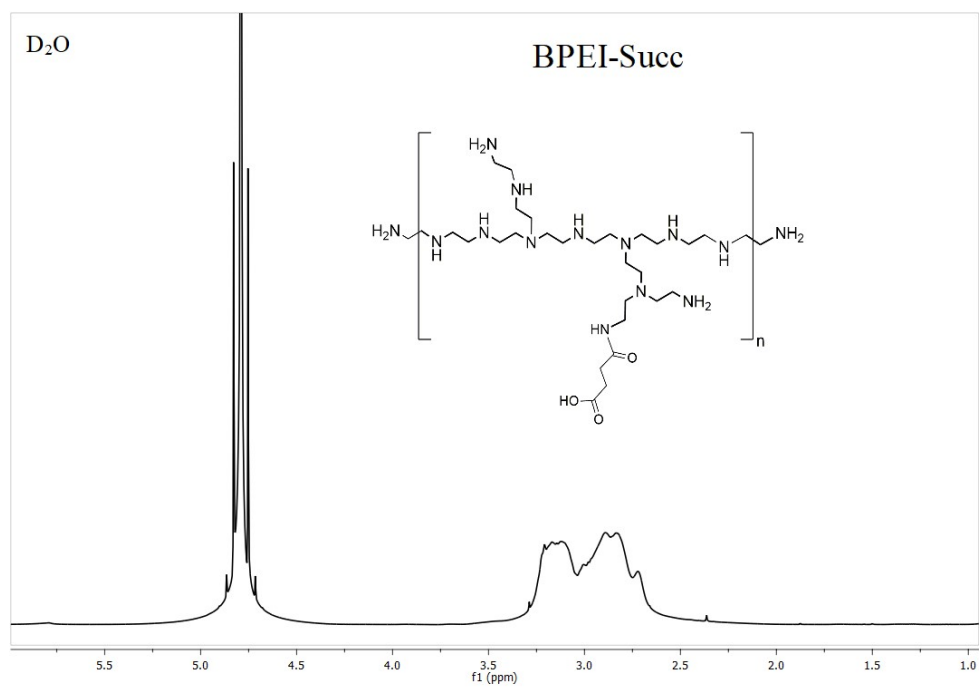

**Figure S5.** <sup>1</sup>H NMR (400 MHz) spectra of BPEI-Succ in D<sub>2</sub>O.

**Figure S6.** FTIR spectra of BPEI, BPEI-Lac, BPEI-C<sub>12</sub>, BPEI-C<sub>12</sub>-Lac and BPEI-Succ according to the legend.

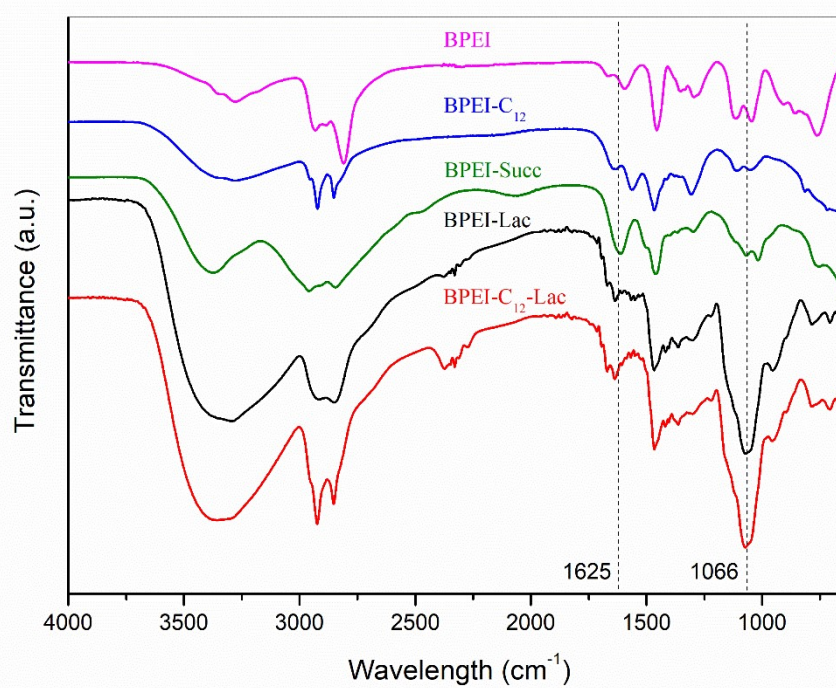

Supplement: d3tb00477e1.pdf [file d3tb00477e1.pdf]
